# Supplementary material for: Preparation of N, P co-doped activated carbons derived from honeycomb as an electrode material for supercapacitors
Source: Royal Society of Chemistry journal article supplement (doi:10.1039/c7ra08759d), 2017-01-01
Supplement: c7ra08759d1.pdf [file c7ra08759d1.pdf]

## Supplementary Information

### **Preparation of N, P co-doped activated carbon derived from the honeycomb as an electrode material for supercapacitors**

*Yan Yan, †<sup>a,b</sup> Mengjiao Xu, †<sup>a,b</sup> Yuqing Luo, <sup>a,b</sup> Jingyi Ma, <sup>a,b</sup> Huan Pang\*<sup>a,b</sup> and Huaiguo Xue\*<sup>a,b</sup>*

*a. School of Chemistry and Chemical Engineering, Yangzhou University, Yangzhou, 225002, Jiangsu, P. R. China*

*b. Institute for Innovative Materials and Energy, Yangzhou University, Yangzhou, 225002, Jiangsu, P. R. China*

\*Email: [huanpangchem@hotmail.com](mailto:huanpangchem@hotmail.com); [panghuan@yzu.edu.cn](mailto:panghuan@yzu.edu.cn); [chhgxue@yzu.edu.cn](mailto:chhgxue@yzu.edu.cn)

† These authors contributed equally to this paper.

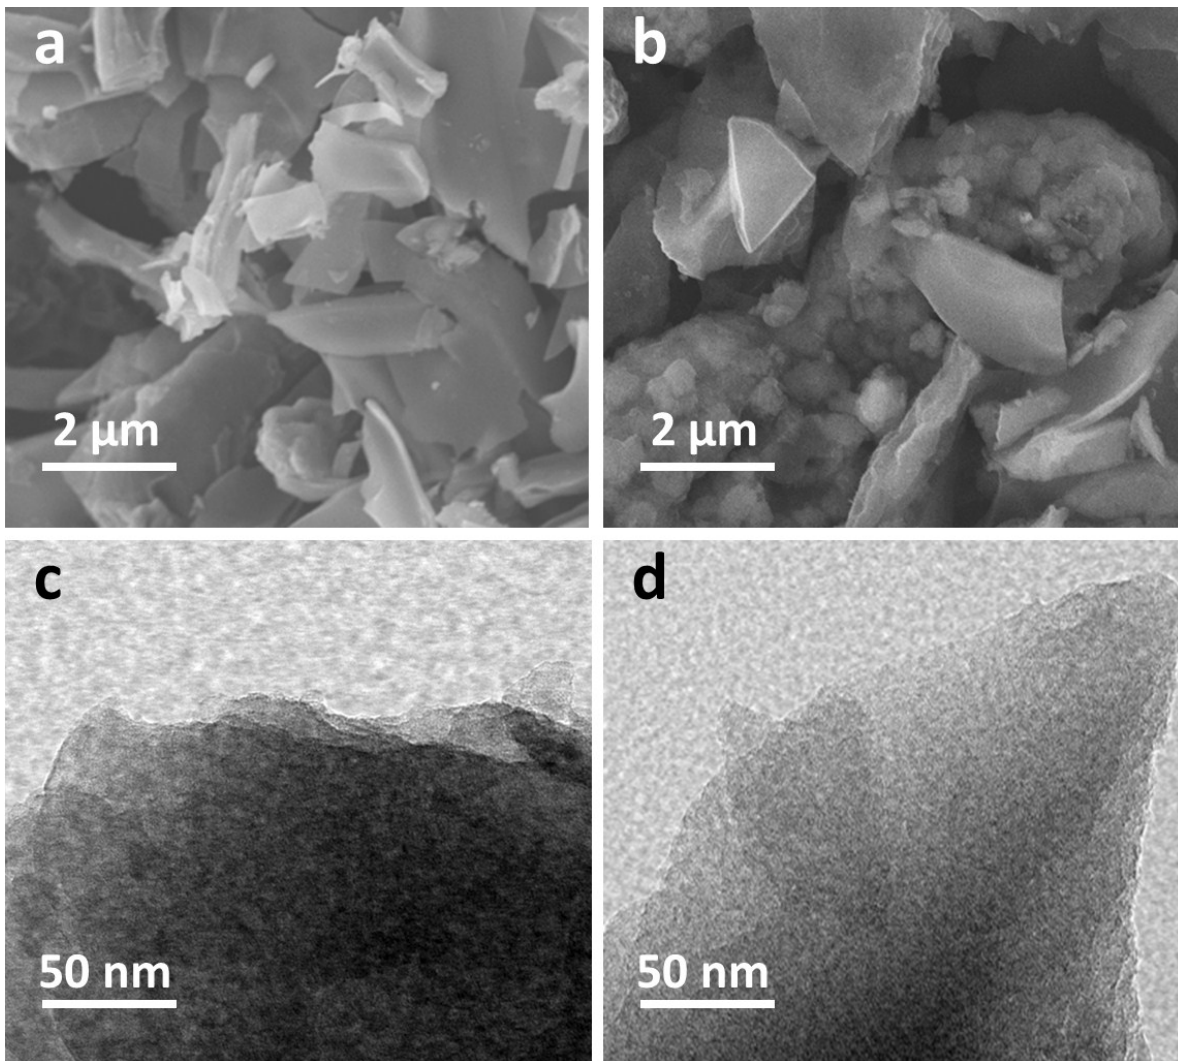

**Figure S1.** FESEM images of (a) A-400 and (b) A-900; (c) HRTEM images of (a) A-400 and (b) A-900.

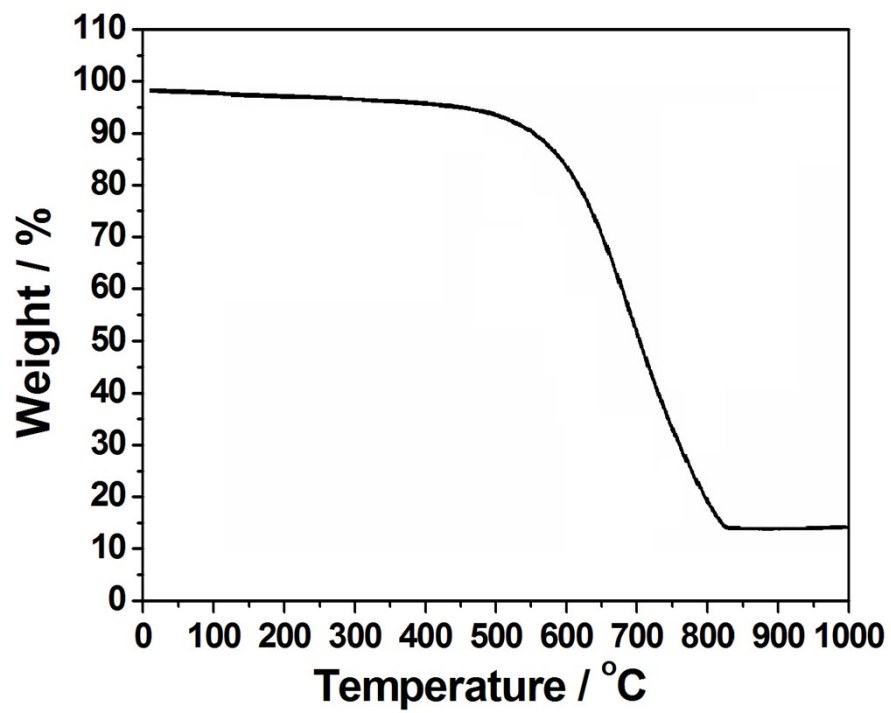

**Figure S2.** TGA curve of the honeycomb.

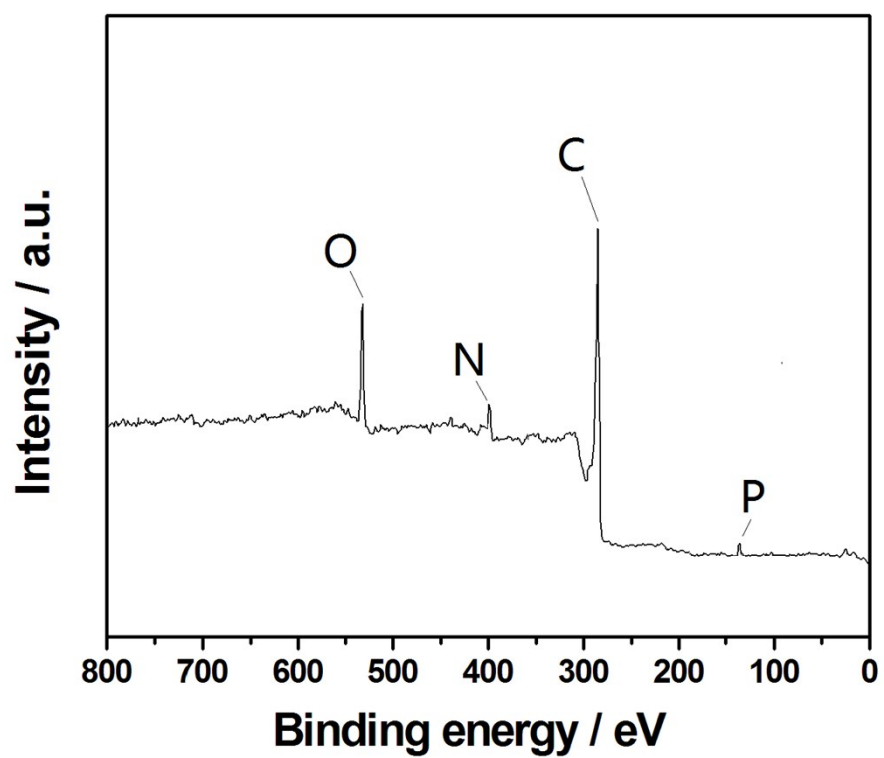

**Figure S3.** Survey spectrum of the honeycomb.

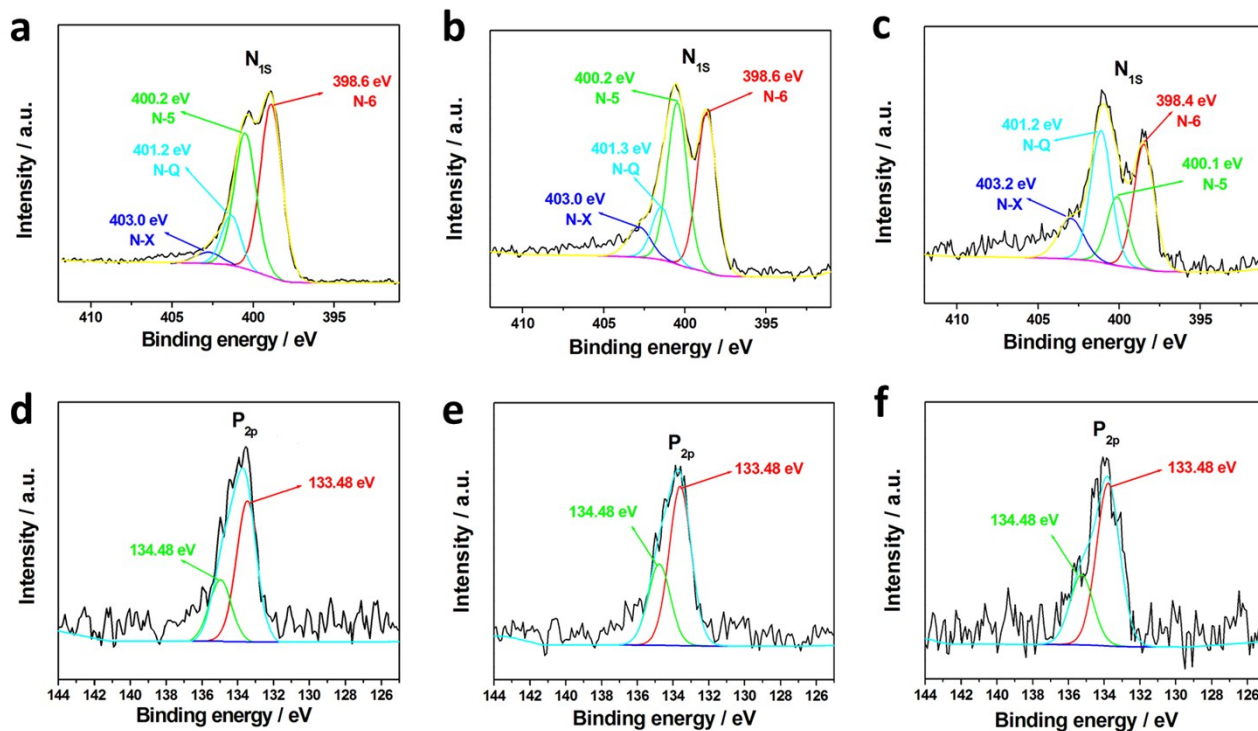

**Figure S4.** N<sub>1s</sub> (a, b, c) and P<sub>2p</sub> (d, e, f) XPS spectra of A-400, A-900, HA-900.

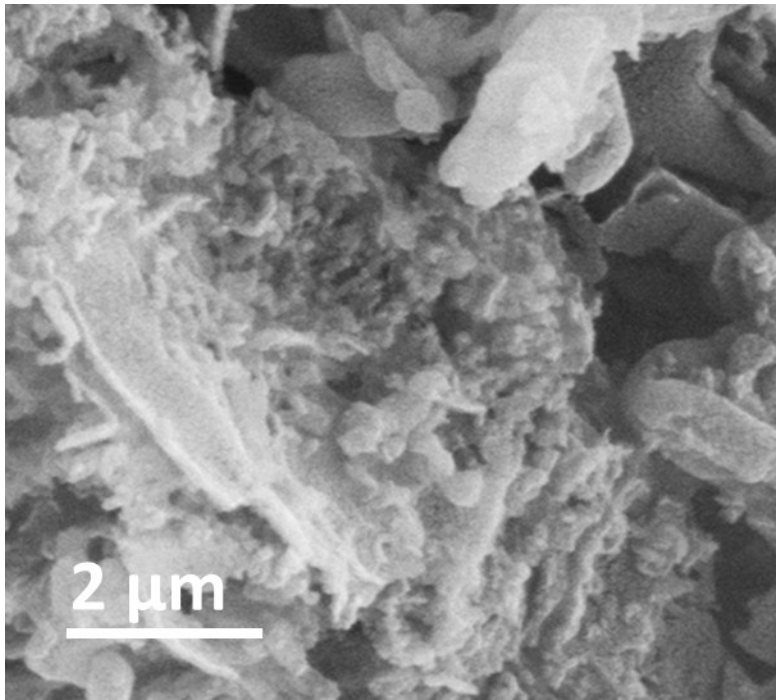

**Figure S5.** The FESEM image of the samples obtained after the 10000 cycle life testing..

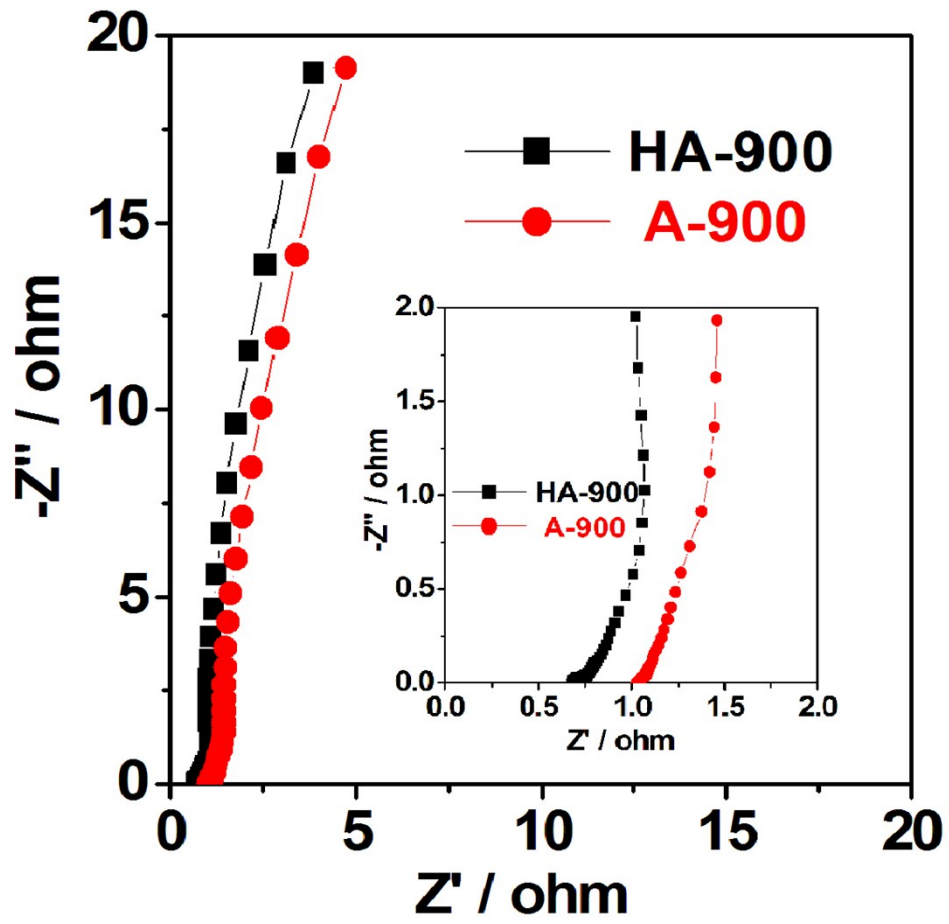

**Figure S6.** The electrochemical impedance spectra (EIS) of HA-900 and A-900 electrodes.

---

| XPS composition (at%) |       |       |       |      |
|-----------------------|-------|-------|-------|------|
| Samples               | C%    | O%    | N%    | P%   |
| honeycomb             | 53.13 | 36.69 | 7.58  | 1.25 |
| A-400                 | 69.28 | 14.63 | 13.12 | 2.97 |
| A-900                 | 78.75 | 11.74 | 8.15  | 1.36 |
| HA-900                | 79.03 | 10.77 | 8.75  | 1.45 |

---

**Table S1.** Detailed XPS Analysis of the Samples
